# Supplementary material for: Distinct neurochemical influences on fMRI response polarity in the striatum
Source: PubMed Central journal article supplement (PMC10907631; doi:10.1038/s41467-024-46088-z), 2024-03-01
Supplement: 41467_2024_46088_MOESM1_ESM.pdf [file 41467_2024_46088_MOESM1_ESM.pdf]

**Distinct neurochemical influences on fMRI response polarity in the striatum**

**Supplementary Information**

**I. Supplementary Figures** ----- Page 2

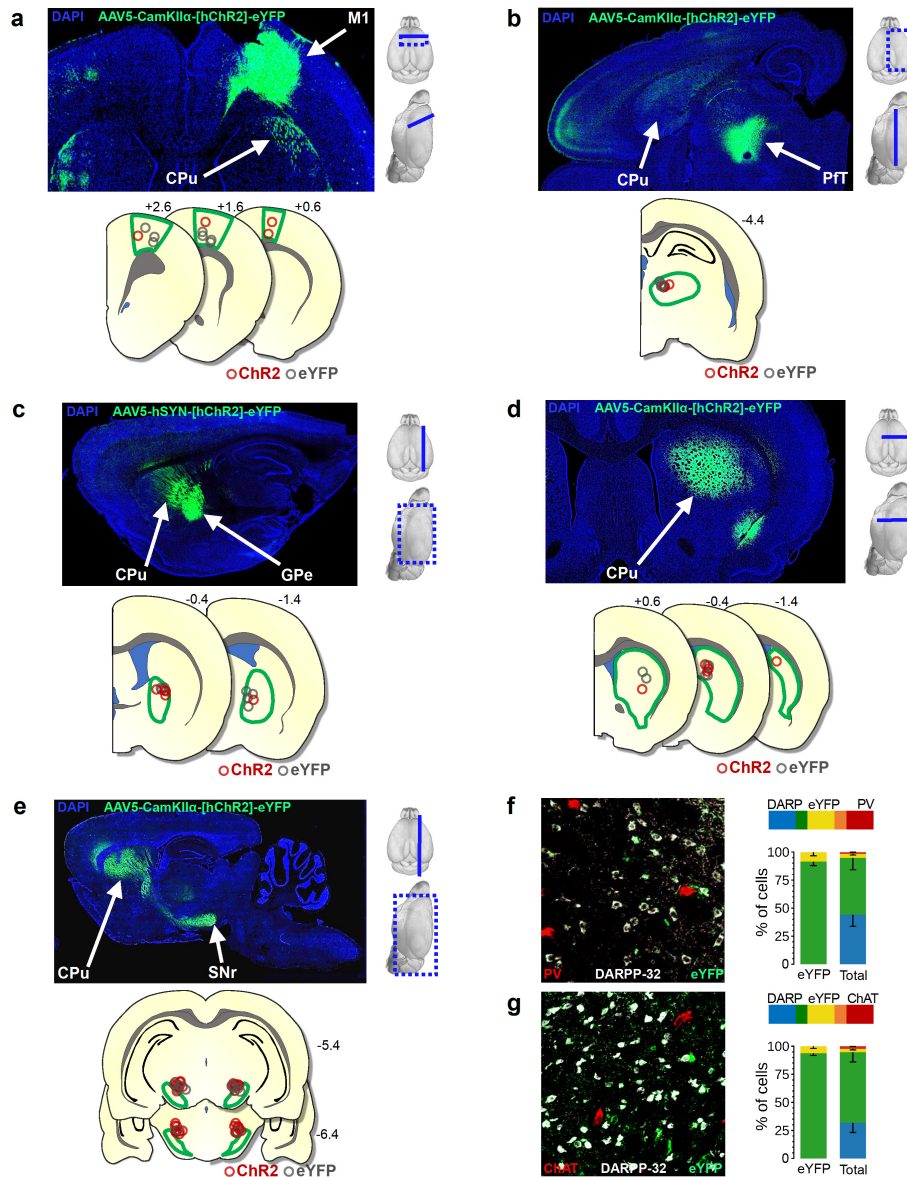

25

26 **Fig. S1: Confirmation of optogenetic fMRI stimulation targets in Figure 1.** a-e (top) Representative cross-section indicating  
 27 spread of eYFP for each stimulation target, with 3-D models of the brain to the right, indicating the location of the histological  
 28 slice. a-e (bottom) Locations of optical fiber tips relative to the anatomical stimulation target ROI outlined in green. Stimulation  
 29 targets and areas of interest are as follows: **a** Viral expression in M1 injection sites and its spread to CPU. **b** Viral expression  
 30 at the PfT injection site and its spread to CPU. **c** Viral expression at the GPe injection site and its spread to CPU. **d** Viral expression  
 31 in the CPU for direct MSN stimulation. **e** Viral expression at the CPU injection site and its spread to SNr stimulation sites. **f-g**  
 32 High-resolution 20x magnification representative image and immunohistochemical verification of DARPP-32 (DARPP-32), eYFP,



33 and either PV (f) or ChAT (g) co-expression in striatum (PV n = 2 brains, 7 slices, 6195 cells; ChAT n = 3 brains, 11 slices,  
34 14181 cells; data are presented as mean  $\pm$ SEM). Source data are provided as a Source Data file.

35

36

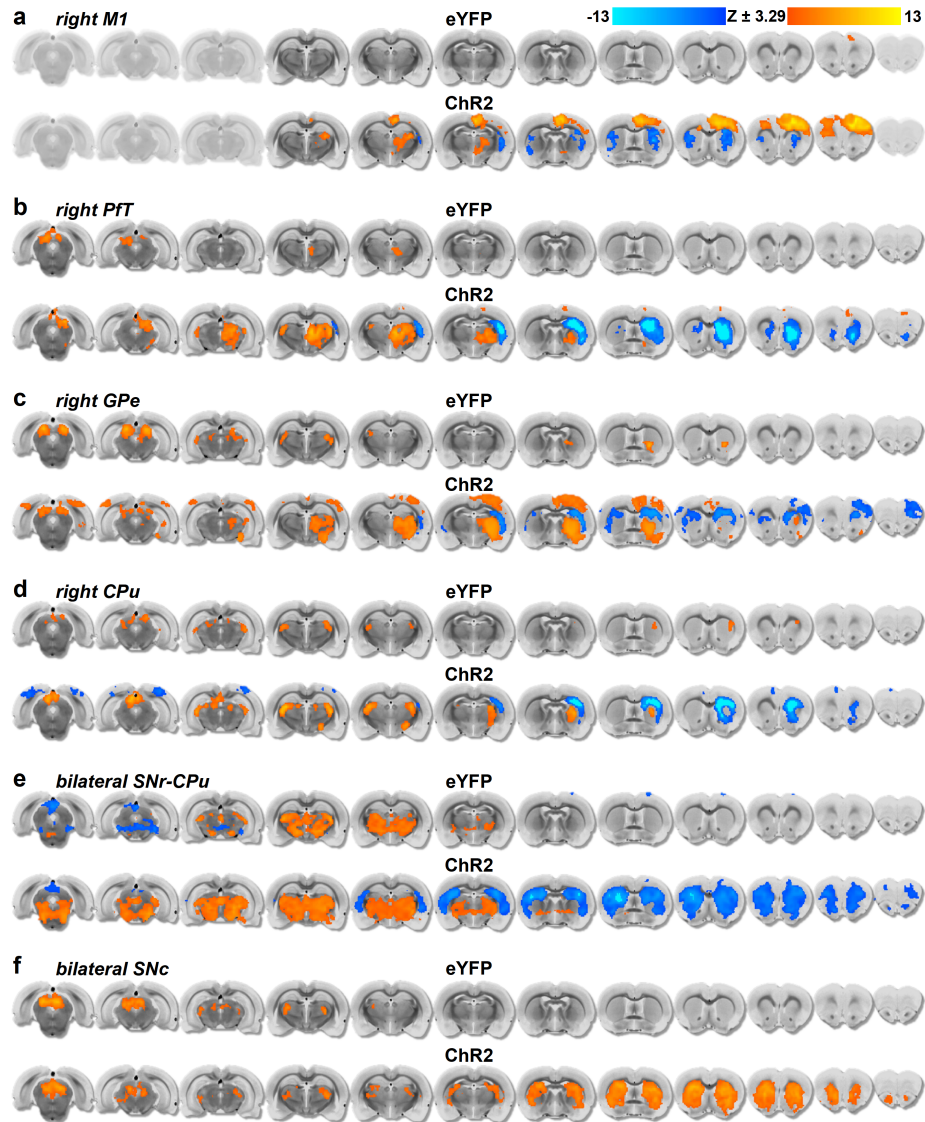

37

38 **Fig. S2: Extended 12-slice optogenetic CBV-fMRI response maps acquired during CPu circuit manipulations in Figure**  
39 **1. a-f** Response maps acquired from eYFP control and ChR2 subjects following optogenetic stimulation of the circuit indicated  
40 at the top left of each set of maps. Left-to-right corresponds to 1 mm steps in the posterior-to-anterior direction, with the 5<sup>th</sup>  
41 slice from the right located at the anterior commissure (approximately  $-0.36$  mm AP). Response maps thresholded to  $p < 0.001$

42 (two-tailed), FWE corrected to  $\alpha < 0.01$ . Note that responses in visual-related areas are likely the result of activity induced by  
43 side effects of photostimulation.

44

45

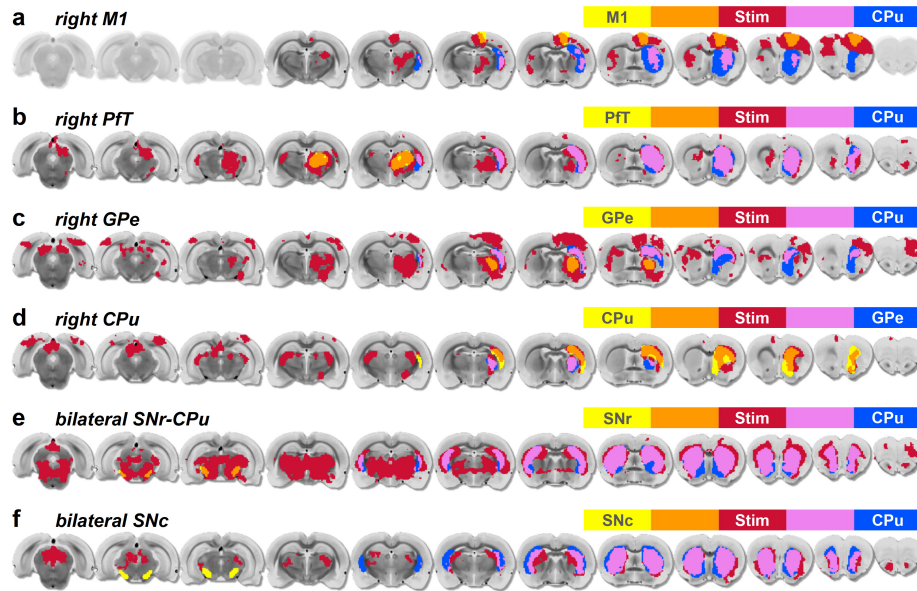

46

47 **Fig. S3: Extended 12-slice optogenetic fMRI ROI maps from CPu circuit manipulations in Figure 1.** a-f ROIs used for  
48 timeseries extraction were collected from the intersection of the stimulus evoked response maps (red) and anatomical  
49 stimulation targets (yellow) or downstream anatomical areas of interest (blue), corresponding to the orange and purple regions,  
50 respectively. f Note, no stimulus evoked response was detected within the anatomical boundaries of SNc for bilateral SNc  
51 dopamine neuron stimulation. Left-to-right corresponds to 1 mm steps in the posterior-to-anterior direction, with the 5<sup>th</sup> slice  
52 from the right located at the anterior commissure (approximately -0.36 mm AP).

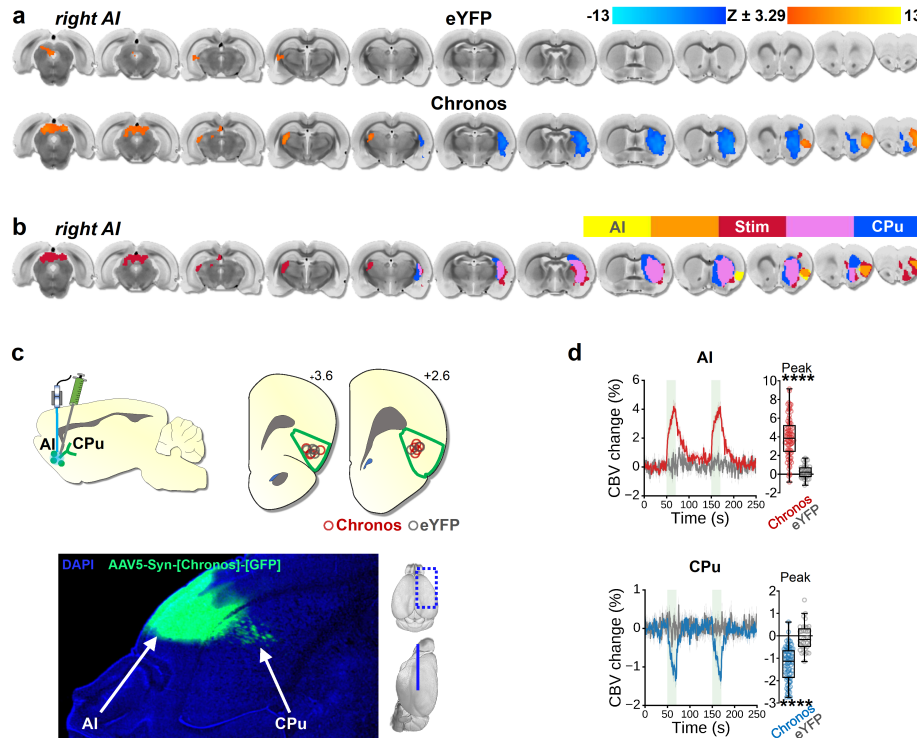

53

54 **Fig. S4: 20 Hz optogenetic stimulation of anterior insular cortex (AI) during CBV fMRI.** a fMRI response maps acquired  
55 from eYFP control and Chronos subjects following optogenetic stimulation of the right AI. Response maps thresholded to  $p <$   
56 0.001 (two-tailed), FWE corrected to  $\alpha < 0.01$ . b ROIs used for timeseries extraction were collected from the intersection of  
57 the stimulus evoked response map (red) and anatomical boundary of AI (yellow) or CPu (blue), corresponding to the orange  
58 and purple regions, respectively. a-b Left-to-right corresponds to 1 mm steps in the posterior-to-anterior direction, with the 5<sup>th</sup>  
59 slice from the right located at the anterior commissure (approximately  $-0.36$  mm AP). c Stimulation schematics (top left),  
60 where AI viral expression and projections to CPu are indicated in green (not all projections shown) and optogenetically  
61 stimulated area of AI is indicated in blue; locations of optical fiber tips for AI optogenetic stimulation (top right); representative  
62 tissue cross-section indicating spread of eYFP for from AI injection site (bottom), with 3-D models of the brain to the right  
63 indicating the location of the histological slice. d CBV time-courses from AI response maps (left) and CPu response maps  
64 (right) aligned to stimulation epochs (green bars indicate 20 Hz optogenetic stimulation blocks; data are presented as mean  
65  $\pm$ SEM), with corresponding quantified peak amplitude changes (Chronos vs. eYFP two-tailed Welch's t-test, \*\*\*\*p < 0.0001;  
66 box plots span IQR, with median line and whiskers within bounds  $\pm 1.5$  IQR, using Tukey's method.). a-d AI stimulation (20  
67 s on, 80 s rest; 20 Hz, 10 mW power at fiber tip, 5 ms pulse-width) during CBV fMRI data (Chronos n = 9 rats, 40 epochs, 80

68 peaks; eYFP n = 6 rats, 18 epochs, 36 peaks). Exact p-values and test statistics are in Source Data. Source data are provided as  
 69 a Source Data file.

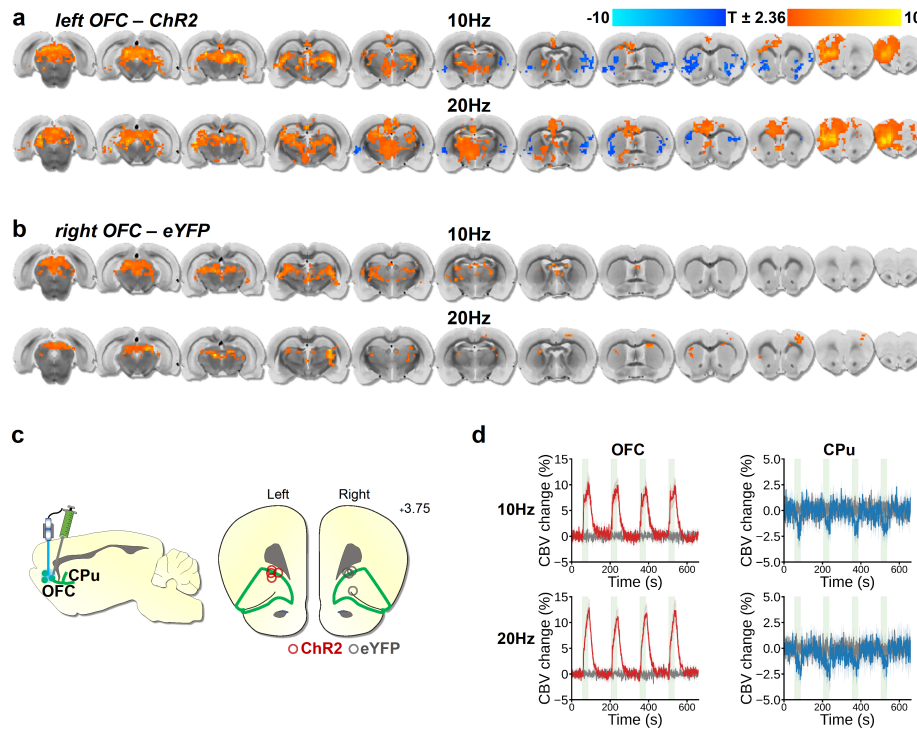

70

71 **Fig. S5: 10 and 20 Hz optogenetic stimulation of orbitofrontal cortex (OFC) during CBV fMRI.** fMRI response maps  
 72 were acquired from unilateral optogenetic stimulation of the OFC (5 ms pulse width, 473 nm wavelength, 10 mW power),  
 73 using a paradigm of 30 s stimulation off, followed by 15 s stimulation on then 60 s off repeated a total of four times, in either  
 74 the ChR2-containing (left) hemisphere, **a**, at 10 Hz (top) and 20 Hz (bottom), or the eYFP-containing control (right)  
 75 hemisphere, **b**, at 10 Hz (top) and 20 Hz (bottom), of four rats (3 male, 1 female). **a-b** Response maps were obtained from  
 76 one-sample two-tailed t-tests using the AFNI<sup>4</sup> 3dttest++ command and thresholded to  $p < 0.05$  without multiple comparison  
 77 correction due to the limited statistical power of this proof-of-concept experiment. Instead, a cluster voxel size  $> 40$  was  
 78 applied. Left-to-right images correspond to 1 mm steps in the posterior-to-anterior direction, with the 5<sup>th</sup> slice from the right  
 79 located at the anterior commissure (approximately  $-0.36$  mm AP). Before group-level analysis, data were preprocessed for  
 80 slice timing and motion corrections with AFNI and spatially aligned to the Tohoku rat brain template<sup>1</sup> using ITK-SNAP.<sup>2</sup>  
 81 Functional images were smoothed with a 0.5 mm FWHM Gaussian kernel and first-level GLM was conducted via AFNI  
 82 3dDeconvolve against the MION hemodynamic response function convolved with the stimulation paradigm, which also  
 83 included a second-order polynomial curve and motion parameters. **c** Stimulation schematics (left), where OFC viral

84 expression and projections to CPu are indicated in green (not all projections shown) and optogenetically stimulated area of  
 85 OFC is indicated in blue; locations of optical fiber tips for OFC optogenetic stimulation (right), implanted 0.5 mm above the  
 86 viral infusion site. **d** CBV time-course data for 10 Hz stimulation (top) and 20 Hz stimulation (bottom) was extracted from  
 87 experimenter defined ROIs corresponding to the generated evoked contrast maps, trimmed to the anatomical boundaries of  
 88 the OFC (left) and CPu (right) regions (green bars indicate optogenetic stimulation blocks; data are presented as mean  $\pm$ SEM;  
 89  $n = 4$  rats). All other surgical procedures, animal preparation for scanning and scanning protocol, and the percent CBV  
 90 change for time-course data calculation was as described in the main Methods.

91  
 92

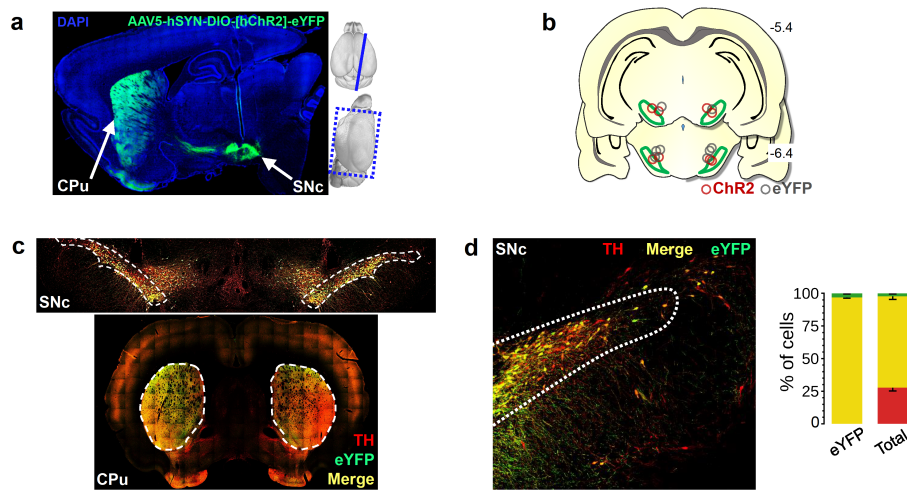

93

94 **Fig. S6: Confirmation of optogenetic fMRI SNc dopamine neuron stimulation targets in Figure 1.** **a** Representative  
 95 sagittal cross-section indicating spread of TH-Cre-selective ChR2-eYFP expression from the injection site in SNc to the  
 96 projection site in CPu. 3-D models of the brain are to the right, indicating the location of the histological slice. **b** Locations of  
 97 optical fiber tips for SNc optogenetic stimulation with fMRI. Anatomical SNc ROI is outlined in green. **c** Representative image  
 98 for high-resolution immunohistochemical verification of bilateral TH and eYFP coexpression in SNc and striatum. **d**  
 99 Immunohistochemical staining used to verify expression of eYFP fluorophore in TH-expressing cells in the SNc ( $n = 3$  brains,  
 100 22 slices, 5911 cells); percentages calculated relative to eYFP-positive cells only (left column) or all cells (right column) in  
 101 SNc target area (data are presented as mean  $\pm$ SEM). Source data are provided as a Source Data file.



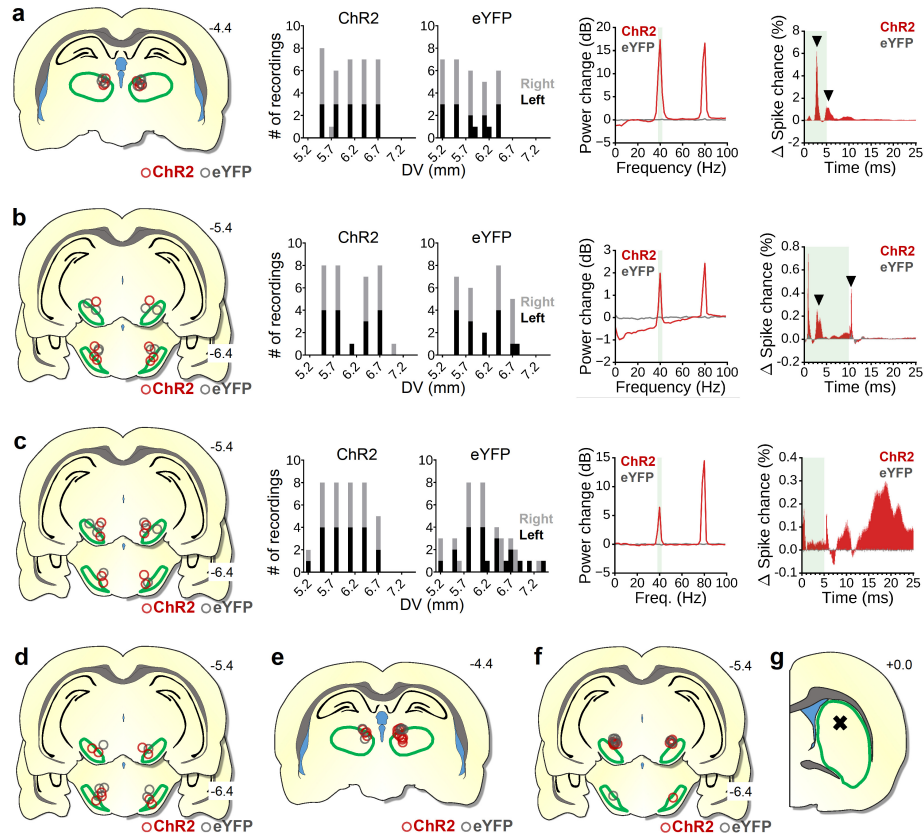

102

103

104

105

106

107

108

109

110

111

112

113

**Fig. S7: Verification of optogenetic stimulation targets, electrode placements, and electrophysiology and FSCV recordings in Figure 2.** **a-c** Left to right columns: Locations of optical fiber tips relative to the anatomical stimulation target ROI (outlined in green) for electrophysiology experiments; Acute electrophysiology electrode array implantation depths, where color indicates the recorded hemisphere; Resulting LFP power spectrum change relative to baseline from 40 Hz (highlighted in green) stimulations (data are presented as mean  $\pm$ SEM); Change in average multi-unit spike probability for the period following each stimulation pulse (green shaded area) compared to baseline (data are presented as mean  $\pm$ SEM). **a** 10 s, 40 Hz, 5 ms pulse-width PfT stimulation. **b** 60 s, 40 Hz, 10 ms pulse-width SNr stimulation. **a, b** (right column) Black down arrows (left to right) highlight prominent peaks at  $\sim$ 3 ms and at offset of ChR2 stimulation. **c** 10 s, 40 Hz, 5 ms pulse-width SNc dopamine neuron stimulation. **d-f** From left to right: Locations of optical fiber tips for SNc, PfT, and SNr optogenetic stimulation with FSCV, respectively. **g** Acute FSCV electrode implantation depth for both ChR2 and eYFP subjects. Source data are provided as a Source Data file.

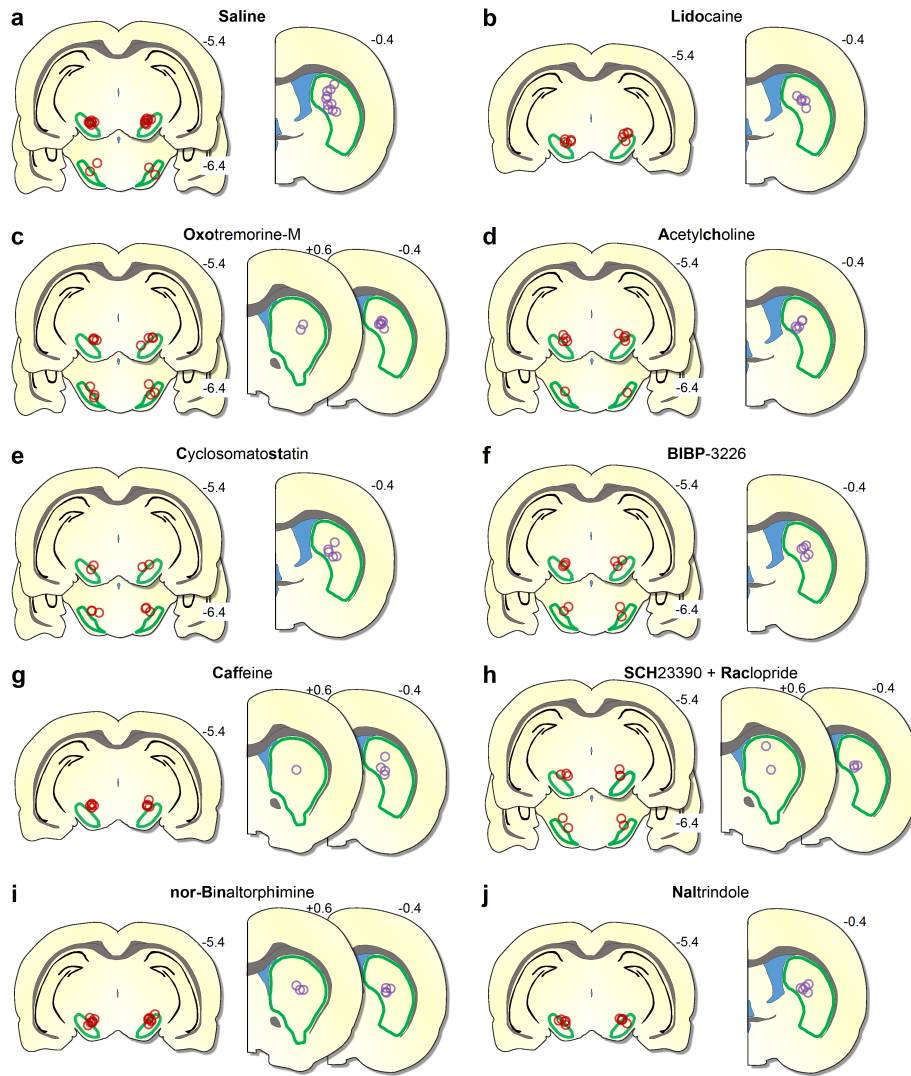

114

115 **Fig. S8: Locations of stimulating optical fiber (red) and infusion cannula (purple) tips in subjects from pharmacological**

116 **CBV-fMRI in Figure 4. a-j** Anatomical boundaries for the optogenetic stimulation site (SNr) and drug infusion site (CPu) are

117 outlined in green. The drug being infused is indicated at the top of each panel.



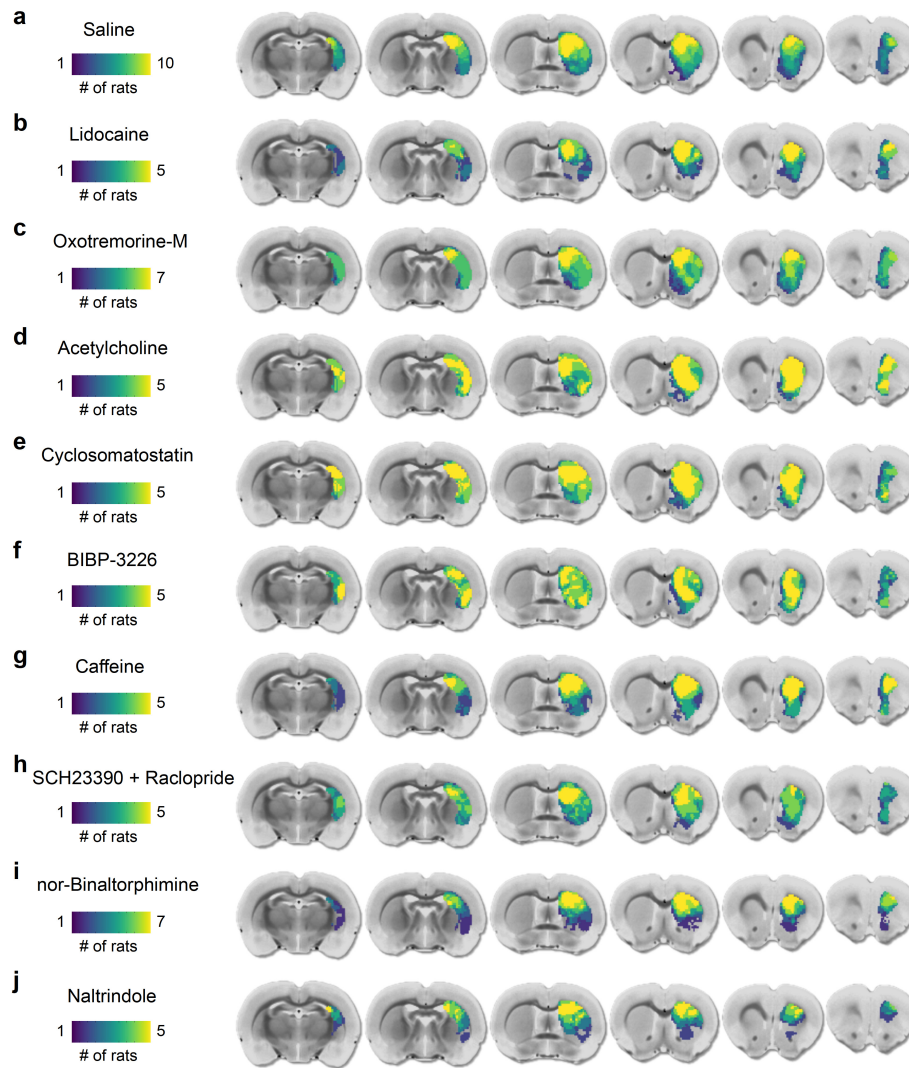

118

119

120

121

122

**Fig. S9: Extended 6-slice ROI maps used for pharmacological CBV-fMRI studies in Figure 4. a-j** ROIs used for timeseries extraction were determined by the intersection of individual subject pre-drug evoked response maps and the anatomical boundaries of the right CPU, extending from slices 2-7 out of 12, anterior to posterior. The drug being infused is indicated at the top left of each row.

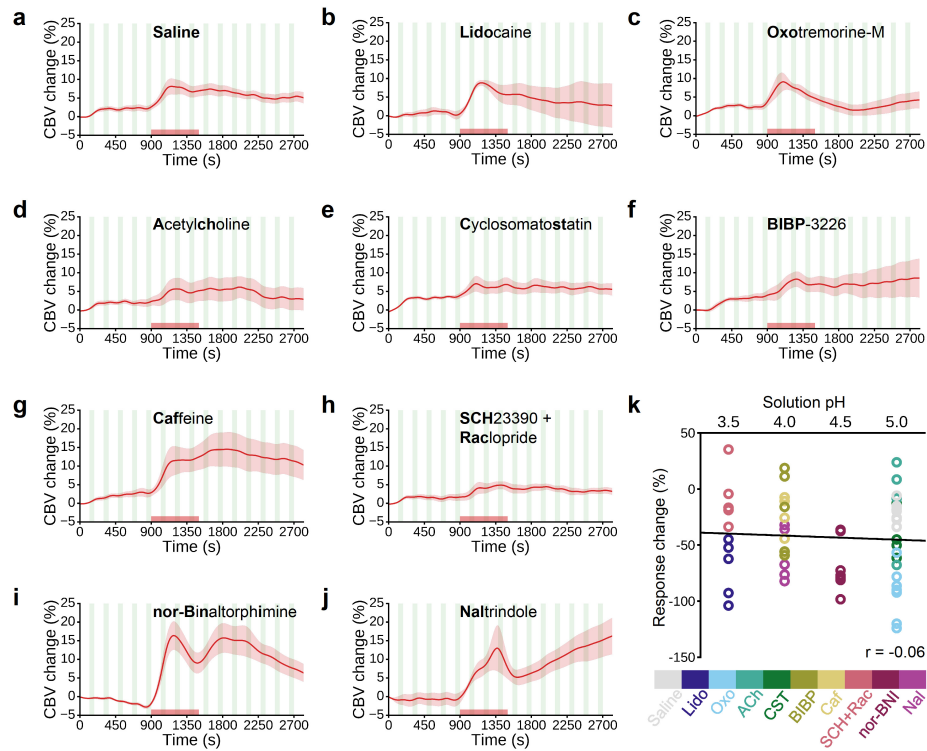

123

124

125

126

127

128

129

130

**Fig. S10: Drug infusion controls from pharmacological CBV-fMRI experiments in Figure 4.** a-j CBV baseline subtraction time-courses as a result of asymmetric least squares and quantile regression methods to correct for drug infusions (Time-course data are presented as mean  $\pm$ SEM). The drug being infused is indicated at the top of each panel. Stimulation periods are indicated by green shaded bars and the infusion epochs are indicated by a shaded red bar on the x-axis. k Solution pH values obtained from freshly prepared drug in triplicate, compared to the percent change in CBV baseline during its in vivo infusion. Open circles indicate individual pH readings, color-coded to the appropriate drug name listed below. Source data are provided as a Source Data file.

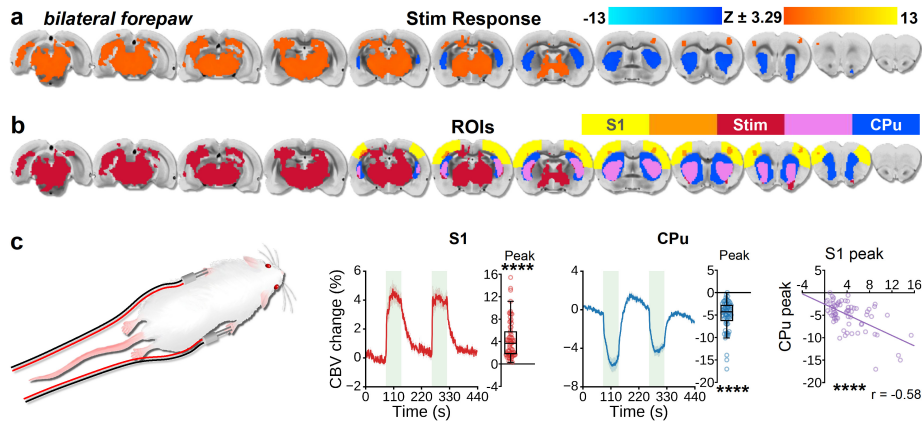

131

132 **Fig. S11: Noxious forepaw stimulation elicits negative CBV-fMRI signals in rat CPu.** Bilateral noxious electrical forepaw  
 133 stimulation during CBV fMRI produced a significant positive bilateral response in the primary somatosensory cortex (S1) and  
 134 a robust negative bilateral stimulus-evoked response in CPu (a-c), and these responses were linearly anticorrelated in peak  
 135 amplitude (c, far right column). a Response maps acquired from subjects following bilateral noxious forepaw stimulation (n =  
 136 14 rats, 34 epochs). Response maps thresholded to  $p < 0.001$  (two-tailed), FWE corrected to  $\alpha < 0.01$ . b ROIs used for S1 and  
 137 CPu timeseries extraction were collected from the intersection of the stimulus evoked response maps (red) and anatomical  
 138 stimulation targets (yellow) or downstream anatomical areas of interest (blue), corresponding to the orange and purple regions,  
 139 respectively. a-b Left-to-right corresponds to 1 mm steps in the posterior-to-anterior direction, with the 5<sup>th</sup> slice from the right  
 140 located at the anterior commissure (approximately -0.36 mm AP). c Left to right columns: Bilateral forepaw stimulation  
 141 schematic; CBV time-course from S1, aligned to stimulation epochs (n = 34 epochs; green bars indicate optogenetic stimulation  
 142 blocks; data are presented as mean  $\pm$ SEM), with corresponding quantified peak amplitude changes (n = 68 peaks; one-sample  
 143 two-tailed t-test, \*\*\*\*p < 0.0001; box plots span IQR, with median line and whiskers within bounds  $\pm 1.5$  IQR, using Tukey's  
 144 method); corresponding CBV time-course and peak amplitude changes from CPu; Correlation plot between peak S1 and CPu  
 145 CBV (linear regression two-tailed t-test, \*\*\*\*p < 0.0001). Exact p-values and test statistics are in Source Data. Source data are  
 146 provided as a Source Data file.

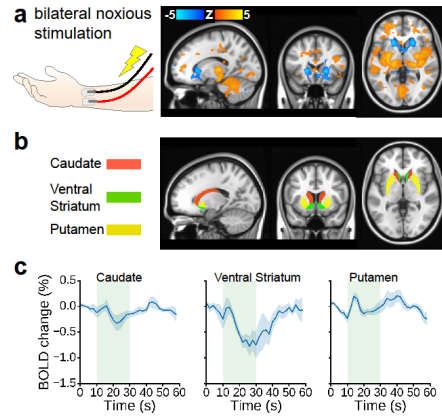

147

148 **Fig. S12: Unmasked human response maps and striatum timeseries from noxious peripheral stimulation in Fig. 6b. a**

149 Unmasked human BOLD fMRI response maps corresponding to the masked response maps presented in Fig. 6b. **b** Human

150 striatum anatomical ROI mask used for time-course extraction, color-coded by striatal compartment. **c** Stimulation aligned

151 (green bars indicate stimulation ON), BOLD fMRI time-courses from each bilateral striatal compartment (n = 7 subjects, 11

152 scans; data are shown as subject mean  $\pm$ SEM).

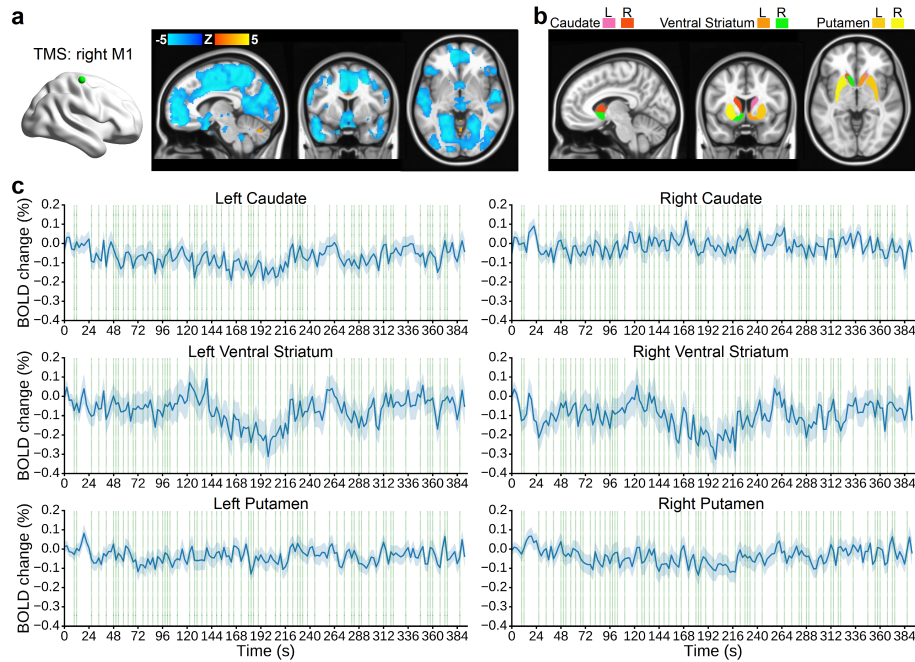

153

154

155

156

157

158

**Fig. S13: Unmasked human response maps and striatum timeseries from right M1 TMS in Fig. 6c.** **a** Unmasked human BOLD fMRI response maps corresponding to the masked response maps presented in Fig. 6c. **b** Human striatum anatomical ROI mask used for time-course extraction, color-coded by hemisphere and striatal compartment. **c** BOLD fMRI time-courses from each unilateral striatal compartment during fast event-related delivery of TMS pulses (pulse delivery was consistent between subjects and pulses are indicated by green bars;  $n = 79$  subjects; data are shown as subject mean  $\pm$  SEM).

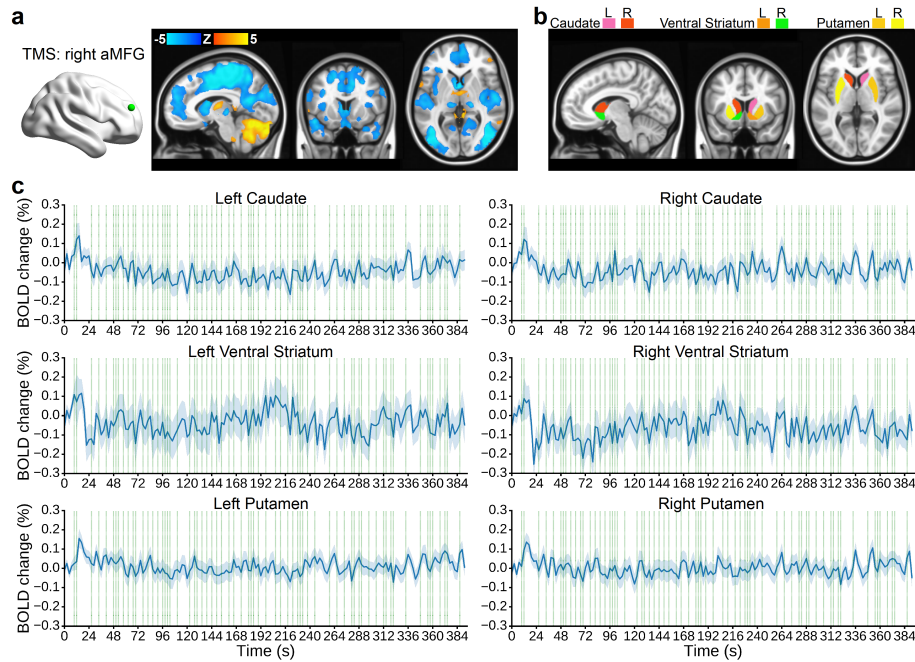

159

160

161

162

163

164

**Fig. S14: Unmasked human response maps and striatum timeseries from right aMFG TMS in Fig. 6d.** **a** Unmasked human BOLD fMRI response maps corresponding to the masked response maps presented in Fig. 6d. **b** Human striatum anatomical ROI mask used for time-course extraction, color-coded by hemisphere and striatal compartment. **c** BOLD fMRI time-courses from each unilateral striatal compartment during fast event-related delivery of TMS pulses (pulse delivery was consistent between subjects and pulses are indicated by green bars;  $n = 80$  subjects; data are shown as subject mean  $\pm$ SEM).

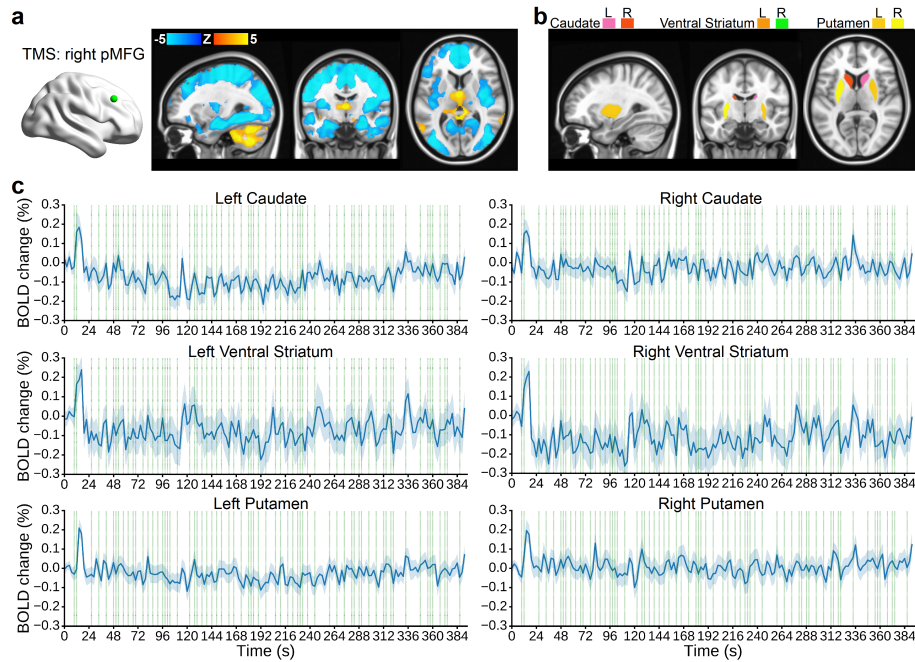

165

166

167

168

169

170

**Fig. S15: Unmasked human response maps and striatum timeseries from right pMFG TMS in Fig. 6e.** **a** Unmasked human BOLD fMRI response maps corresponding to the masked response maps presented in Fig. 6e. **b** Human striatum anatomical ROI mask used for time-course extraction, color-coded by hemisphere and striatal compartment. **c** BOLD fMRI time-courses from each unilateral striatal compartment during fast event-related delivery of TMS pulses (pulse delivery was consistent between subjects and pulses are indicated by green bars;  $n = 79$  subjects; data are shown as subject mean  $\pm$ SEM).



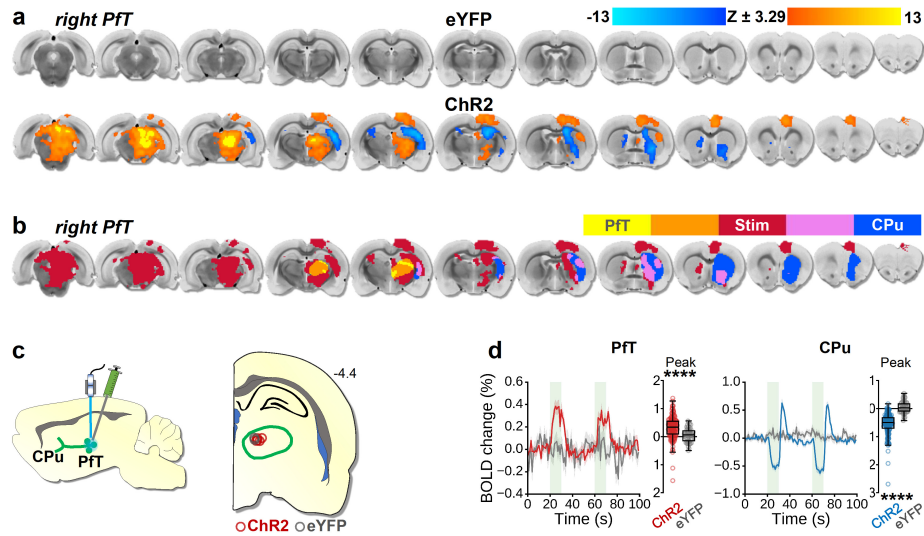

171

172 **Fig. S16: Optogenetic stimulation of PFT during BOLD fMRI.** **a** BOLD fMRI response maps acquired from eYFP control  
 173 and ChR2 subjects following optogenetic stimulation of the right PFT. Response maps thresholded to  $p < 0.001$  (two-tailed),  
 174 FWE corrected to  $\alpha < 0.01$ . **b** ROIs used for timeseries extraction were collected from the intersection of the stimulus evoked  
 175 response map (red) and anatomical boundary of PFT (yellow) or CPu (blue), corresponding to the orange and purple regions,  
 176 respectively. **a-b** Left-to-right corresponds to 1 mm steps in the posterior-to-anterior direction, with the 5th slice from the right  
 177 located at the anterior commissure (approximately  $-0.36$  mm AP). **c** Stimulation schematics (left), where PFT viral expression  
 178 and projections to CPu are indicated in green (not all projections shown) and optogenetically stimulated area of PFT is indicated  
 179 in blue, and locations of optical fiber tips for PFT optogenetic stimulation (right). **d** BOLD time-courses from PFT response  
 180 maps (left) and CPu response maps (right) aligned to stimulation epochs (green bars indicate 40 Hz optogenetic stimulation  
 181 blocks; data are presented as mean  $\pm$  SEM), with corresponding quantified peak amplitude changes (ChR2 vs. eYFP Welch's  
 182 two-tailed t-test, \*\*\*\* $p < 0.0001$ ; box plots span IQR, with median line and whiskers within bounds  $\pm 1.5$  IQR, using Tukey's  
 183 method). **a-d** PFT stimulation during BOLD fMRI data (ChR2  $n = 5$  rats, 75 epochs, 150 peaks; eYFP  $n = 2$  rats, 30 epochs, 60  
 184 peaks). While the time course extracted from the CPu ROI displayed negative BOLD changes during the stimulus period, we  
 185 also observed a minor cluster exhibiting positive BOLD activation within the dorsolateral CPu. Notably, in a separate  
 186 experiment employing identical manipulation, only negative CBV responses were elicited in the CPu (Fig. 1b, Fig. S2b). The  
 187 increases in BOLD in dorsolateral CPu, potentially accompanied by decreases in CBV, could occur when CBV decreases  
 188 substantially without prominent alterations in blood oxygenation, resulting in reduced deoxyhemoglobin occupancy and  
 189 susceptibility effects. Alternatively, this observation may indeed be a result of the interplay between two competing forces  
 190 within the CPu, as discussed in the main text of this manuscript: feed-forward vasoconstrictive neurotransmission versus

191 activity-driven metabolic processes. It is plausible that BOLD, being a contrast sensitive to multiple physiological factors, is  
 192 capable of capturing these nuanced differences within distinct territories of the CPu that may not be discernible through CBV  
 193 measurement alone.<sup>3</sup> Given the multifaceted nature of the BOLD signal, which can be influenced by varying alterations in  
 194 blood oxygenation, blood flow, CBV, and local oxygen consumption, it is imperative that future multimodal neuroimaging  
 195 studies are conducted to systematically dissect the underlying biophysical mechanisms driving this intriguing observation.  
 196 Exact p-values and test statistics are in Source Data. Source data are provided as a Source Data file.

197  
 198

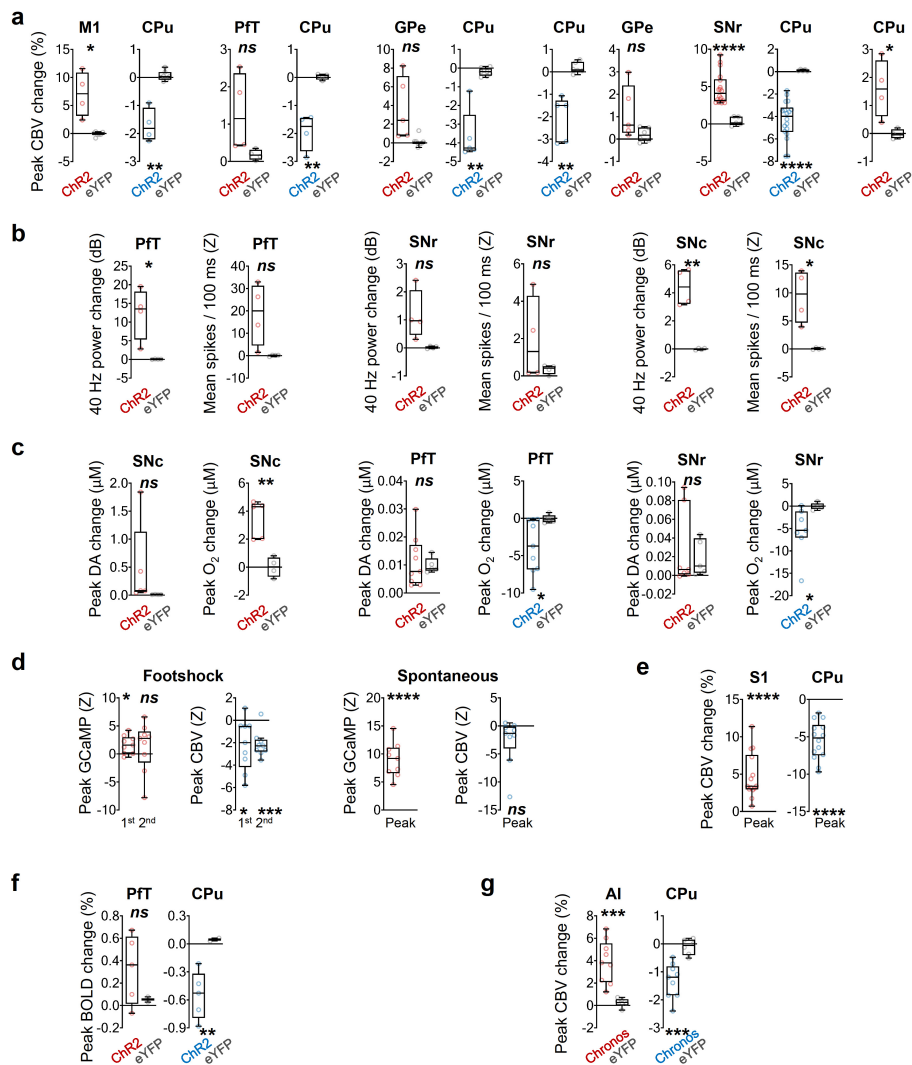

199

200 **Fig. S17: Analyses reproductions with subject-level mean data. a** (Fig. 1) CBV fMRI response peaks to optogenetic  
 201 stimulation; from left to right: (Fig. 1a) M1 stimulation (Chr2 vs. eYFP two-tailed Welch's t-test, \* $p < 0.05$ , \*\* $p < 0.01$ ); (Fig.

202 1b) PfT stimulation (ChR2 vs. eYFP two-tailed Welch's t-test,  $^{ns}p > 0.05$ ,  $^{**}p < 0.01$ ); (Fig. 1c) GPe stimulation (ChR2 vs.  
203 eYFP two-tailed Welch's t-test,  $^{ns}p > 0.05$ ,  $^{**}p < 0.01$ ); (Fig. 1d) CPU stimulation (ChR2 vs. eYFP two-tailed Welch's t-test,  
204  $^{ns}p > 0.05$ ,  $^{**}p < 0.01$ ); (Fig. 1e) SNr stimulation (ChR2 vs. eYFP two-tailed Welch's t-test,  $^{****}p < 0.0001$ ); (Fig. 1f) SNc  
205 stimulation (ChR2 vs. eYFP two-tailed Welch's t-test,  $^{*}p < 0.05$ ). **b** (Fig. 2a-c) Electrophysiology 40Hz LFP power change  
206 and mean MUA spike frequency during optogenetic stimulation; from left to right: (Fig. 2a) PfT stimulation LFP (ChR2 vs.  
207 eYFP two-tailed Welch's t-test,  $^{*}p < 0.05$ ) and MUA (ChR2 vs. eYFP two-tailed Welch's t-test,  $^{ns}p > 0.05$ ); (Fig. 2b) SNr  
208 stimulation LFP (ChR2 vs. eYFP two-tailed Welch's t-test,  $^{ns}p > 0.05$ ) and MUA (ChR2 vs. eYFP two-tailed Welch's t-test,  
209  $^{ns}p > 0.05$ ); (Fig. 2c) SNc stimulation LFP (ChR2 vs. eYFP two-tailed Welch's t-test,  $^{**}p < 0.01$ ) and MUA (ChR2 vs. eYFP  
210 two-tailed Welch's t-test,  $^{*}p < 0.05$ ). **c** (Fig. 2e-g) Voltammetry DA and O<sub>2</sub> response peaks to optogenetic stimulation; from  
211 left to right: (Fig. 2e) SNc stimulation DA (ChR2 vs. eYFP two-tailed Welch's t-test,  $^{ns}p > 0.05$ ) and O<sub>2</sub> (ChR2 vs. eYFP two-  
212 tailed Welch's t-test,  $^{**}p < 0.01$ ); (Fig. 2f) PfT stimulation DA (ChR2 vs. eYFP two-tailed Welch's t-test,  $^{ns}p > 0.05$ ) and O<sub>2</sub>  
213 (ChR2 vs. eYFP two-tailed Welch's t-test,  $^{*}p < 0.05$ ); (Fig. 2g) SNr stimulation DA (ChR2 vs. eYFP two-tailed Welch's t-test,  
214  $^{ns}p > 0.05$ ) and O<sub>2</sub> (ChR2 vs. eYFP two-tailed Welch's t-test,  $^{*}p < 0.05$ ). **d** (Fig. 3) GCaMP and CBV photometry peaks from  
215 footshocks and relative to spontaneous GCaMP activity; from left to right: (fig. 3b) footshock response GCaMP (1<sup>st</sup> peak one-  
216 sample two-tailed t-test,  $^{*}p < 0.05$ ; 2<sup>nd</sup> peak one-sample two-tailed t-test,  $^{ns}p > 0.05$ ) and CBV (1<sup>st</sup> peak one-sample two-tailed  
217 t-test,  $^{*}p < 0.05$ ; 2<sup>nd</sup> peak one-sample two-tailed t-test,  $^{***}p < 0.0001$ ); (fig. 3c) spontaneous activity GCaMP (one-sample  
218 two-tailed t-test,  $^{****}p < 0.0001$ ) and CBV (one-sample two-tailed t-test,  $^{ns}p > 0.05$ ). **e** (Fig. S11) CBV fMRI response peaks  
219 to noxious forepaw stimulation (one-sample two-tailed t-test,  $^{****}p < 0.0001$ ). **f** (Fig. S16) BOLD fMRI response peaks to  
220 optogenetic PfT stimulation (ChR2 vs. eYFP, two-tailed Welch's t-test,  $^{ns}p > 0.05$ ,  $^{**}p < 0.01$ ). **g** (Fig. S4) CBV fMRI response  
221 peaks to optogenetic AI stimulation (Chronos vs. eYFP two-tailed Welch's t-test,  $^{***}p < 0.001$ ). Box plots span IQR, with  
222 median line and whiskers within bounds  $\pm 1.5$  IQR, using Tukey's method. Exact p-values and test statistics are in Source Data.  
223 Source data are provided as a Source Data file.

224 **References**

- 225 1. Valdés-Hernández PA, *et al.* An in vivo MRI Template Set for Morphometry, Tissue  
226 Segmentation, and fMRI Localization in Rats. *Frontiers in neuroinformatics* **5**, 26 (2011).  
227
- 228 2. Yushkevich PA, *et al.* User-guided 3D active contour segmentation of anatomical structures:  
229 Significantly improved efficiency and reliability. *NeuroImage* **31**, 1116-1128 (2006).  
230
- 231 3. Drew PJ. Vascular and neural basis of the BOLD signal. *Curr Opin Neurobiol* **58**, 61-69 (2019).  
232
